# Supplementary material for: Frequent monoallelic or skewed expression for developmental genes in CNS-derived cells and evidence for balancing selection
Source: PubMed Central journal article supplement — Proc Natl Acad Sci U S A. 2018 Oct 15;115(44):E10379–86. doi: 10.1073/pnas.1808652115 (PMC6217436; doi:10.1073/pnas.1808652115), 2018-10-15
Supplement: pnas.1808652115.sapp.pdf [file pnas.1808652115.sapp.pdf]

1

## 2 **Supplementary Information for**

### 3 **Monoallelic and skewed expression in mouse CNS-derived clonal cell lines: Balancing** 4 **selection for developmental stage-specific genes**

5 **Sergio Branciamore, Zuzana Valo, Min Li, Jinhui Wang, Arthur D. Riggs, and Judith Singer-Sam**

6 **Sergio Branciamore E-mail: [sbranciamore@coh.org](mailto:sbranciamore@coh.org),**

7 **Arthur D. Riggs E-mail: [ariggs@coh.org](mailto:ariggs@coh.org),**

8 **Judith Singer-Sam E-mail: [jsam@coh.org](mailto:jsam@coh.org)**

#### 9 **This PDF file includes:**

10 Figs. S1 to S2

11 Tables S1 to S6

12 References for SI reference citations

**Table S1. Probability that  $S_{D_3}$  is originated from state  $S_{D_0}$  where S is one of three possible states of expression (monoallelic, bi-allelic, not expressed),  $D_0$  refers to *nsc* before induction of differentiation, and  $D_3$  refers to *asl* after three days of differentiation.**

|                     | $D_0$ mono | $D_0$ bi-allelic | $D_0$ non expressed |
|---------------------|------------|------------------|---------------------|
| $D_3$ mono          | 53%        | 3%               | 44%                 |
| $D_3$ bi-allelic    | < 1%       | 79%              | 21%                 |
| $D_3$ not expressed | 0.01       | 0.1              | 0.89                |

**Table S2. Ontology analysis of all genes expressed in *nsc***

| GO         |                                                                        | p-value (Benjamini)   |
|------------|------------------------------------------------------------------------|-----------------------|
| GO:0000279 | M phase;                                                               | $7.4 \times 10^{-21}$ |
| GO:0022403 | cell cycle phase;                                                      | $1.7 \times 10^{-18}$ |
| GO:0022402 | cell cycle process;                                                    | $2.2 \times 10^{-16}$ |
| GO:0000087 | M phase of mitotic cell cycle;                                         | $2.9 \times 10^{-15}$ |
| GO:0007067 | mitosis;                                                               | $2.9 \times 10^{-15}$ |
| GO:0005694 | chromosome;                                                            | $1.5 \times 10^{-13}$ |
| GO:0044427 | chromosomal part;                                                      | $3.8 \times 10^{-13}$ |
| GO:0006259 | DNA metabolic process;                                                 | $4.2 \times 10^{-13}$ |
| GO:0006281 | DNA repair;                                                            | $3.3 \times 10^{-12}$ |
| GO:0006974 | response to DNA damage stimulus;                                       | $1.7 \times 10^{-11}$ |
| GO:0009719 | response to endogenous stimulus;                                       | $9.3 \times 10^{-11}$ |
| GO:0000775 | chromosome, pericentric region;                                        | $4.2 \times 10^{-10}$ |
| GO:0005634 | nucleus;                                                               | $2.5 \times 10^{-6}$  |
| GO:0006260 | DNA replication;                                                       | 0.00016               |
| GO:0043228 | non-membrane-bound organelle;                                          | 0.00024               |
| GO:0043232 | intracellular non-membrane-bound organelle;                            | 0.00024               |
| GO:0051327 | M phase of meiotic cell cycle;                                         | 0.00031               |
| GO:0007126 | meiosis;                                                               | 0.00031               |
| GO:0051321 | meiotic cell cycle;                                                    | 0.00036               |
| GO:0006139 | nucleobase, nucleoside, nucleotide and nucleic acid metabolic process; | 0.00037               |
| GO:0006310 | DNA recombination;                                                     | 0.00058               |

**Table S3. Ontology analysis of all genes expressed in *asl***

| GO         |                                                       | p-value (Benjamini)  |
|------------|-------------------------------------------------------|----------------------|
| GO:0005886 | plasma membrane;                                      | $1.5 \times 10^{-9}$ |
| GO:0005578 | proteinaceous extracellular matrix;                   | $4.1 \times 10^{-9}$ |
| GO:0007166 | cell surface receptor linked signal transduction;     | $2.9 \times 10^{-7}$ |
| GO:0044459 | plasma membrane part;                                 | $7.5 \times 10^{-7}$ |
| GO:0022803 | passive transmembrane transporter activity;           | $1.9 \times 10^{-6}$ |
| GO:0015267 | channel activity;                                     | $1.9 \times 10^{-6}$ |
| GO:0004888 | transmembrane receptor activity;                      | $2.5 \times 10^{-6}$ |
| GO:0031226 | intrinsic to plasma membrane;                         | $4.3 \times 10^{-6}$ |
| GO:0022838 | substrate specific channel activity;                  | $6 \times 10^{-6}$   |
| GO:0006811 | ion transport;                                        | $7.9 \times 10^{-6}$ |
| GO:0005887 | integral to plasma membrane;                          | $9.4 \times 10^{-6}$ |
| GO:0005216 | ion channel activity;                                 | $8.8 \times 10^{-5}$ |
| GO:0048731 | system development;                                   | 0.00015              |
| GO:0015674 | di-, tri-valent inorganic cation transport;           | 0.00015              |
| GO:0005509 | calcium ion binding;                                  | 0.00017              |
| GO:0030001 | metal ion transport;                                  | 0.0002               |
| GO:0048513 | organ development;                                    | 0.00024              |
| GO:0006816 | calcium ion transport;                                | 0.00027              |
| GO:0005261 | cation channel activity;                              | 0.00043              |
| GO:0007186 | G-protein coupled receptor protein signaling pathway; | 0.00057              |
| GO:0022843 | voltage-gated cation channel activity;                | 0.00066              |
| GO:0000267 | cell fraction;                                        | 0.00068              |
| GO:0031224 | intrinsic to membrane;                                | 0.0007               |
| GO:0022836 | gated channel activity;                               | 0.00086              |

**Table S4. Ontology analysis of all genes expressed ( $n_{sc} \cup a_{sl}$ ), ranked by their value of  $\bar{\sigma}$** 

| GO         |                                                              | p-value (Benjamini) |
|------------|--------------------------------------------------------------|---------------------|
| GO:0044424 | intracellular part                                           | 0                   |
| GO:0005578 | proteinaceous extracellular matrix                           | 1.04e-08            |
| GO:0031224 | intrinsic to membrane                                        | 2.6e-08             |
| GO:0005509 | calcium ion binding                                          | 4.24e-08            |
| GO:0016021 | integral to membrane                                         | 5.24e-08            |
| GO:0031226 | intrinsic to plasma membrane                                 | 3.78e-05            |
| GO:0004888 | transmembrane receptor activity                              | 0.000112            |
| GO:0005887 | integral to plasma membrane                                  | 0.00014             |
| GO:0044425 | membrane part                                                | 0.000266            |
| GO:0048503 | GPI anchor binding                                           | 0.000277            |
| GO:0005886 | plasma membrane                                              | 0.00131             |
| GO:0009611 | response to wounding                                         | 0.00346             |
| GO:0022803 | passive transmembrane transporter activity                   | 0.00362             |
| GO:0015267 | channel activity                                             | 0.00362             |
| GO:0005261 | cation channel activity                                      | 0.0042              |
| GO:0044420 | extracellular matrix part                                    | 0.00467             |
| GO:0035150 | multicellular organismal development regulation of tube size | 0.00467             |
| GO:0003018 | vascular process in circulatory system                       | 0.00467             |
| GO:0050880 | regulation of blood vessel size                              | 0.00467             |
| GO:0008217 | blood pressure                                               | 0.00575             |
| GO:0022836 | gated channel activity                                       | 0.0069              |
| GO:0022838 | substrate specific channel activity                          | 0.00957             |
| GO:0007186 | G-protein coupled receptor protein signaling pathway         | 0.0114              |
| GO:0006811 | ion transport                                                | 0.0114              |
| GO:0005216 | ion channel activity                                         | 0.013               |
| GO:0001584 | rhodopsin-like receptor activity                             | 0.0158              |
| GO:0004930 | G-protein coupled receptor activity                          | 0.016               |
| GO:0006817 | phosphate transport                                          | 0.0166              |
| GO:0005830 | cytosolic ribosome (sensu Eukaryota)                         | 0.0172              |
| GO:0008015 | blood circulation                                            | 0.0232              |

**Table S5. Ontology analysis of all genes expressed following removal of the *MAE* gene set, ranked by their value of  $\bar{\sigma}$** 

| GO         |                                              | p-value (Benjamini) |
|------------|----------------------------------------------|---------------------|
| GO:0044424 | intracellular part                           | 0                   |
| GO:0031224 | intrinsic to membrane                        | 2.65e-05            |
| GO:0016021 | integral to membrane                         | 2.7e-05             |
| GO:0005578 | proteinaceous extracellular matrix           | 0.00228             |
| GO:0005261 | cation channel activity                      | 0.00335             |
| GO:0005509 | calcium ion binding                          | 0.00757             |
| GO:0022803 | passive transmembrane transporter activity   | 0.00757             |
| GO:0015267 | channel activity                             | 0.00757             |
| GO:0044425 | membrane part                                | 0.0154              |
| GO:0004888 | transmembrane receptor activity              | 0.0154              |
| GO:0005216 | ion channel activity                         | 0.022               |
| GO:0022838 | substrate specific channel activity          | 0.0223              |
| GO:0046873 | metal ion transmembrane transporter activity | 0.0223              |
| GO:0022836 | gated channel activity                       | 0.0232              |
| GO:0009611 | response to wounding                         | 0.0332              |
| GO:0031226 | intrinsic to plasma membrane                 | 0.0332              |

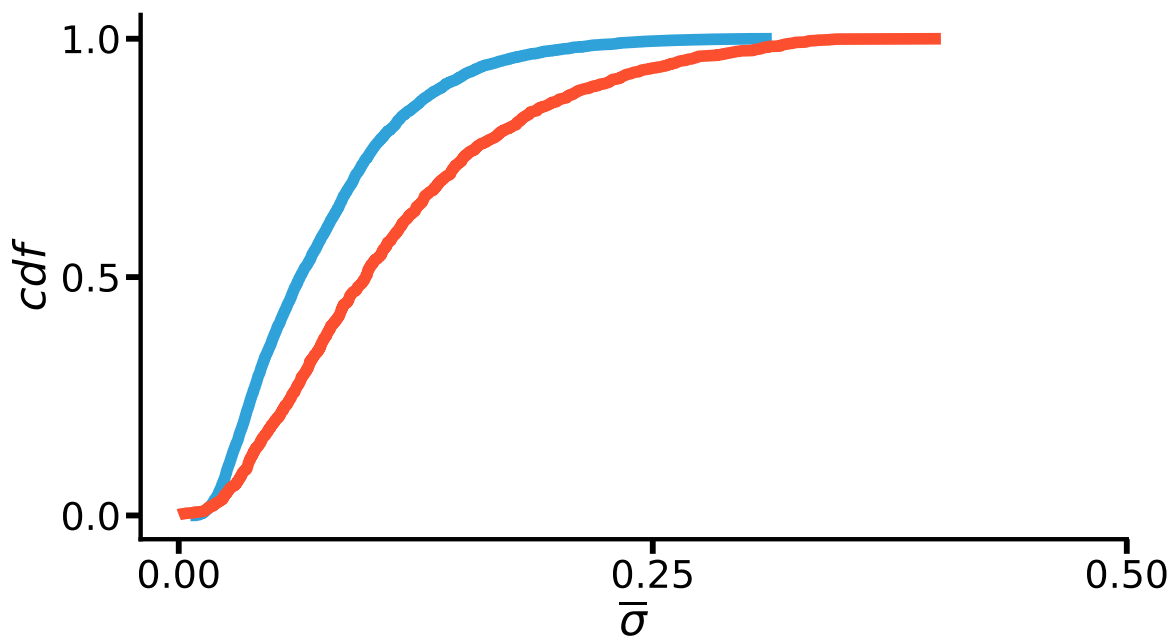

**Fig. S1.** Developmental genes are associated with skewed allele-specific expression even if the *MAE* gene set is removed. The cumulative density distribution is shown for the variable mean of  $\sigma$  (see eq. 1) with the *MAE* gene set subtracted from genes expressed in both cell types (blue) or with *MAE* subtracted from genes expressed in only one cell type (red).

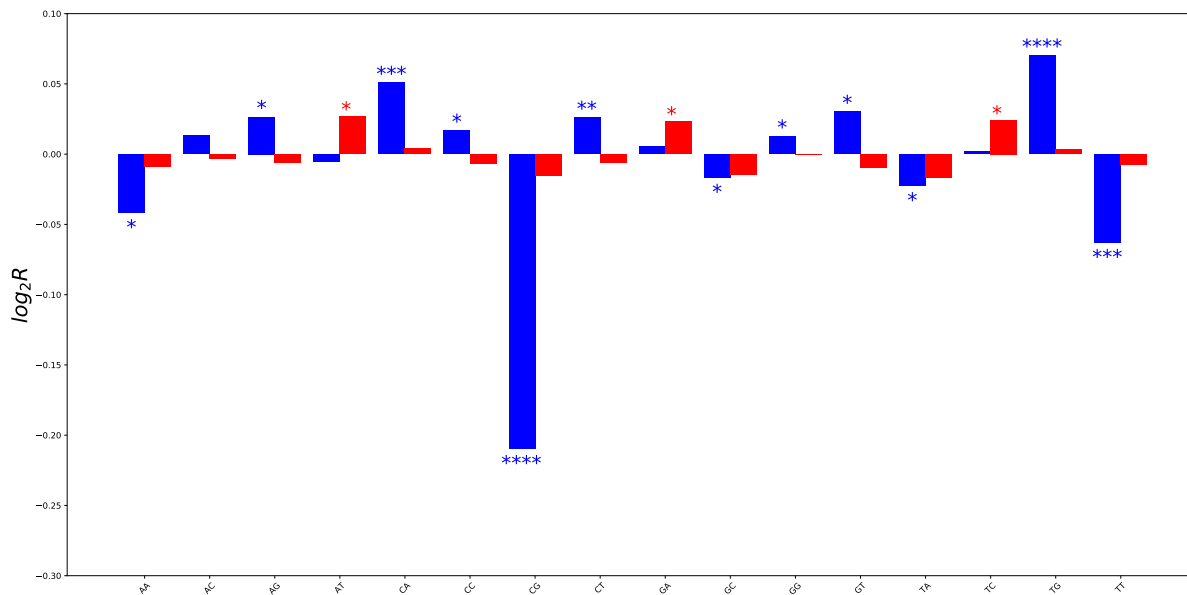

**Fig. S2.** Comparison (R) of the mean observed to expected dinucleotide distribution for genes with MAE vs. (BAE-hkg) where hkg are housekeeping genes. Results are shown for the 5'-proximal (blue) and 3'-proximal (red) region (see Fig 5 gene neighborhoods). \*,\*\*,\* and \*\*\*\* mark the  $p_{value}$  for Mann-Whitney rank test at significance  $< 10^{-2}$ ,  $10^{-5}$ ,  $10^{-10}$  and  $10^{-15}$ , respectively. The list of housekeeping genes was obtained from (1).

**Table S6. List of primers. For the first six genes, reverse transcription and PCR were carried out as previously described (2), with 1.5 mM MgCl<sub>2</sub>, and an annealing temperature of 60 C. For *Gstm5* and *Ncam1*, see Materials and Methods. For each set, the forward and reverse primers are in the first and second rows, respectively. The reference position is the SNP location relative to the upstream primer. Primers were designed with the aid of Primer3 (<http://frodo.wi.mit.edu/primer3>).**

| Gene   | NCBI Refseq  | SNP (B6/JF1) | primer No. | Ref. pos. | Product size | Substrate | Primer sequence        |
|--------|--------------|--------------|------------|-----------|--------------|-----------|------------------------|
| Aldoc  | NM_009657    | C/T          | 453        | 131       | 225          | RNA       | ACAGAGAAGGTCCTGGCTGCT  |
|        |              |              | 454        |           |              | RNA       | AGCCTCCTCTTCACTCTGACC  |
|        |              |              | 465        | 132       | 213          | DNA       | TGCTGTATACAAGGCCCTGAG  |
|        |              |              | 466        |           |              | DNA       | GGAAAACCCCTCAAGTCAGACC |
| Chi3l1 | NM_007695    | G/A          | 455        | 98        | 210          | RNA       | ACCCTCGCTTAAGAGACAAGC  |
|        |              |              | 456        |           |              | RNA       | CTCCATGGAAATCGTAGGTCA  |
|        |              |              | 467        | 177       | 289          | DNA       | TCTGTGTCTGAACTCCAAGCA  |
|        |              |              | 468        |           |              | DNA       | GGAAAAGGTATTGCCTGACAAG |
| Cpxm1  | NM_019696    | T/C          | 457        | 118       | 263          | RNA       | GTCCTGTGACAAGTCCCTCA   |
|        |              |              | 458        |           |              | RNA       | TATGGTAACCCTCAGCACTGG  |
|        |              |              | 469        | 203       | 296          | DNA       | TGCCTAGTCTCAGTGCAACCT  |
|        |              |              | 470        |           |              | DNA       | CTTCTCTCTCTGCCACACAC   |
| Itga7  | NM_008398    | C/T          | 459        | 128       | 235          | RNA       | AGATGCATCCACAGTGATTCC  |
|        |              |              | 460        |           |              | RNA       | CTTGAAGTCTGTGCGGTCTTC  |
|        |              |              | 471        | 148       | 234          | DNA       | CCACTCACTCCAGCTTTTGAG  |
|        |              |              | 472        |           |              | DNA       | TGTGTGGGTGAGAGGCTAACT  |
| Osmr   | NM_011019    | T/C          | 461        | 224       | 290          | RNA       | GGAAGAACCTTGGTCCCAATA  |
|        |              |              | 462        |           |              | RNA       | CTGCATCTCCTTGGATTTAC   |
|        |              |              | 524        | 123       | 192          | DNA       | TGACCATTTCCACAGCATGAC  |
|        |              |              | 525        |           |              | DNA       | GCACTGCATCTCCTTGGATTT  |
| Tm4sf1 | NM_008536    | T/C          | 463        | 132       | 263          | RNA       | TCCTCTATGTGGTCCAAGTGC  |
|        |              |              | 464        |           |              | RNA       | TGCAAAGTCTCACACACAGG   |
|        |              |              | 475        | 132       | 295          | DNA       | TCCTCTATGTGGTCCAAGTGC  |
|        |              |              | 476        |           |              | DNA       | CCCCACAAAGATGAAGTGAGA  |
| Gstm5  | NM_010360    | C/G          | 265        | 128       | 285          | RNA       | AGCTACCTGCACAGCTGAAAC  |
|        |              |              | 266        |           |              | RNA       | CTCTGGCTCAGCATAAGCACT  |
| Ncam1  | NM_001113204 | A/G          | 507        | 108       | 181          | RNA       | GACGTCCGGTTCATAGTCTCT  |
|        |              |              | 508        |           |              | RNA       | CATTCACGATGCTCTGTCTGG  |

## 13 References

- 14 1. Bin L, et al. (2017) A comprehensive mouse transcriptomic bodymap across 17 tissues by rna-seq. *Scientific Reports* 7(1).
- 15 2. Wang J, Valo Z, Smith D, Singer-Sam J (2007) Monoallelic expression of multiple genes in the CNS. *PLoS One* 2(12):e1293.
