# Supplementary material for: Frequent monoallelic or skewed expression for developmental genes in CNS-derived cells and evidence for balancing selection
Source: PubMed Central journal article supplement — Proc Natl Acad Sci U S A. 2018 Oct 15;115(44):E10379–86. doi: 10.1073/pnas.1808652115 (PMC6217436; doi:10.1073/pnas.1808652115), 2018-10-15
Supplement: pnas.1808652115.sd03.pdf [file pnas.1808652115.sd03.pdf]

### RT-PCR dataset:

Allele-specific RT-PCR results for *Aldoc*, *Chi3l1* (*Chil1*), *Cpxm1*, *Itga7*, *Osmr*, and *Tm4sf1*. RNA was purified by use of Trizol (Invitrogen) from cell lines 2A1, 2A5, 3A1 and 4A5 at day 0 and days 3 or 4 following *in vitro* differentiation to astrocytes. For each gene, two pages of SNP tracings following automated sequencing are shown. Controls include 1) RT-PCR of brain tissue of B6 X JF1 hybrid mice, both reciprocal crosses, (top of first page), and 2) PCR of DNA from each sample (second page). DNA was purified by use of the Wizard Genomic DNA Purification Kit (Promega). The primers used for RT-PCR and PCR were selected to include at least one B6/JF1 SNP, and are numbered as shown; see accompanying Supplemental Table S6 for each primer sequence. For each RT-PCR sample, the % expression of the predominant allele is shown; where available, the results of cDNA-seq are shown for comparison.

# Aldoc 453/454

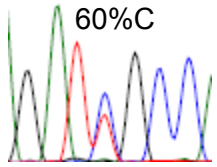

B6MxB6P

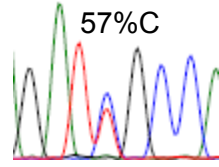

JF1MxB6P

C=B6 T=JF1

FPKM:84.5  
pB6 :0.67

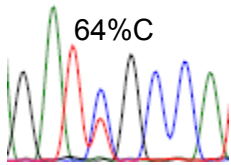

2A1-0

FPKM:74.9  
pB6:0.82

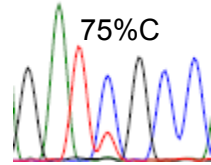

2A5-0

FPKM:176.5  
pB6:0.71

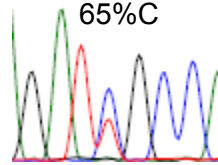

3A1-0

FPKM:67.3  
pB6:0.71

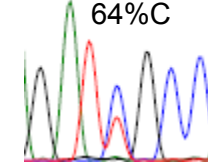

4A5-0

FPKM:183.5  
pB6:0.96

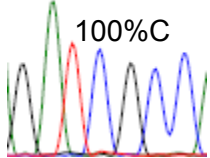

2A1-4

FPKM:329.3  
pB6:0.94

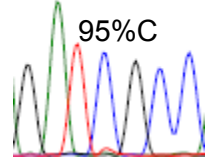

2A5-4

FPKM:363.4  
pB6:0.90

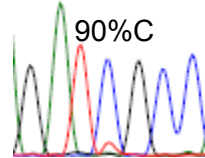

3A1-4

FPKM:215.5  
pB6:0.90

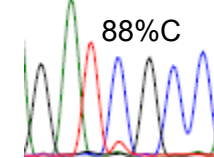

4A5-3

Aldoc **465**/466

DNA

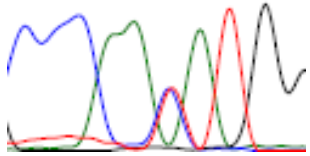

B6MxJF1P

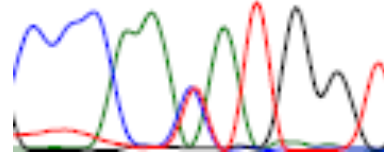

JF1MxB6P

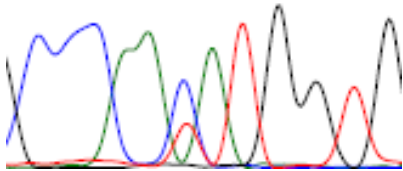

2A1-0

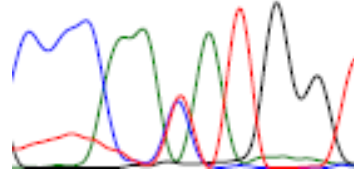

2A5-0

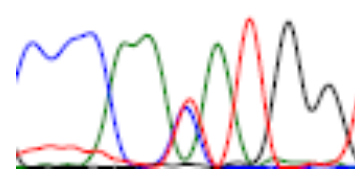

3A1-0

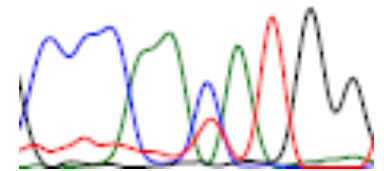

4A5-0

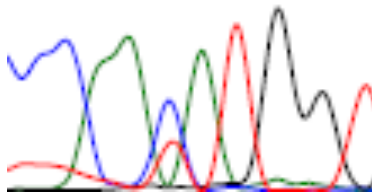

2A1-4

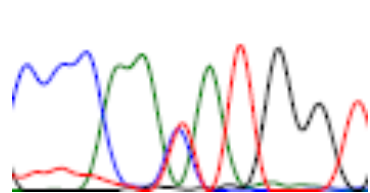

2A5-4

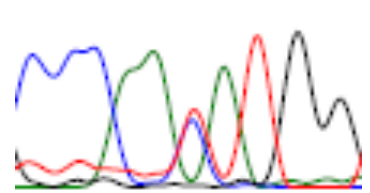

3A1-4

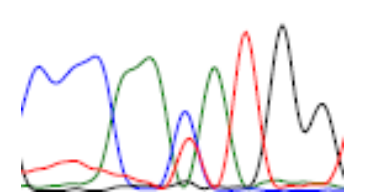

4A5-3

# Chi311 455/456

G=B6 A=JF1

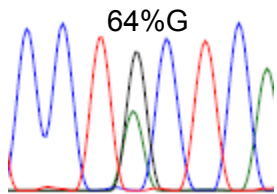

B6MxJF1P

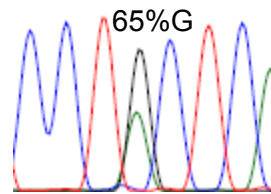

JF1MxB6P

NA

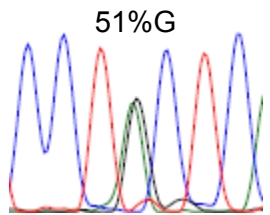

2A1-0

NA

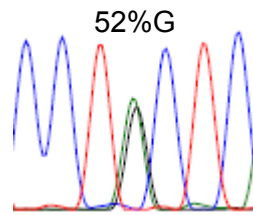

2A5-0

NA

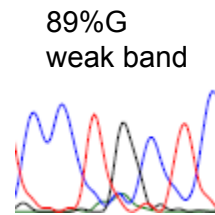

3A1-0

NA

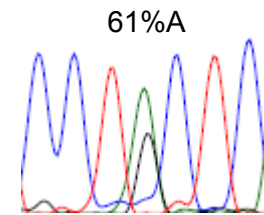

4A5-0

FPKM:111.5  
pB6:0.08

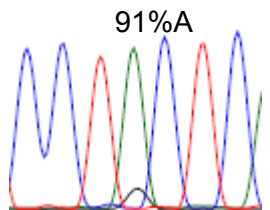

2A1-4

FPKM 3.3  
pB6:0.43

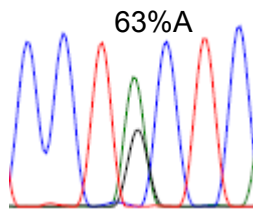

2A5-4

FPKM:54.5  
pB6:0.07

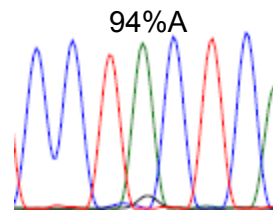

3A1-4

FPKM:97.9  
pB6:0.05

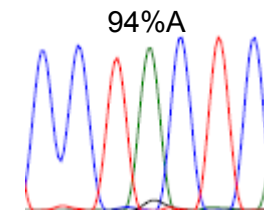

4A5-3

Chi3I1 **467/468**  
DNA

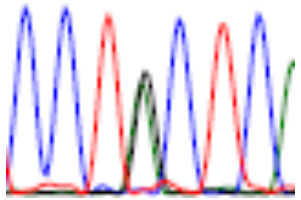

B6MxJF1P

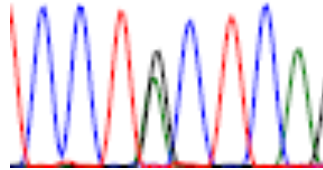

JF1MxB6P

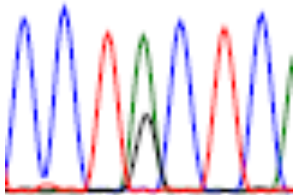

2A1-0

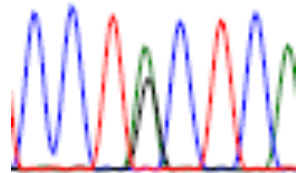

2A5-0

No band

3A1-0

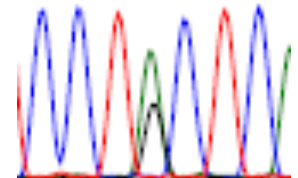

4A5-0

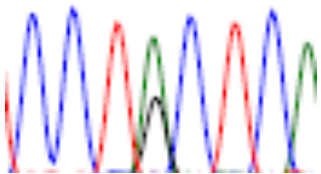

2a1-4

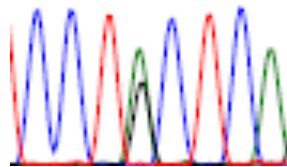

2A5-4

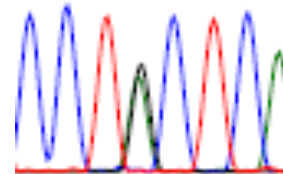

3A1-4

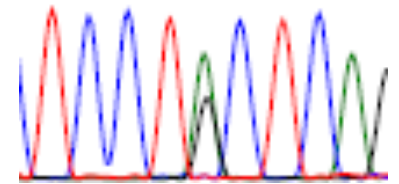

4A5-3

# Cpxm1 457/458

T=B6 C=JF1

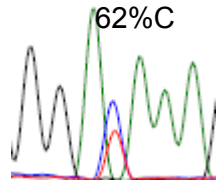

B6MxB6P

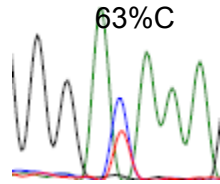

JF1MxB6P

FPKM:7.3  
pB6:0.96

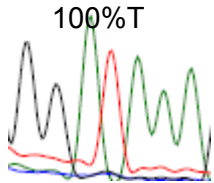

2A1-0

FPKM:11.7  
pB6:0.53

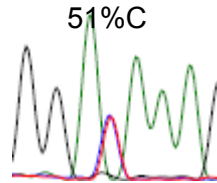

2A5-0

FPKM:8.2  
pB6:0.90

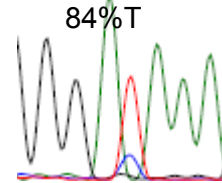

3A1-0

FPKM:5.9  
pB6:0.94

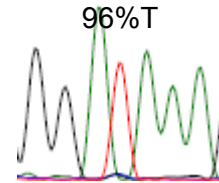

4A5-0

FPKM:35.6  
pB6:1.0

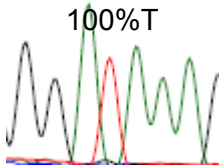

2A1-4

FPKM:12.7  
pB6:0.50

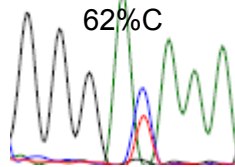

2A5-4

FPKM:25.6  
pB6:0.96

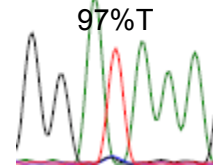

3A1-4

FPKM:51.8  
pB6:0.99

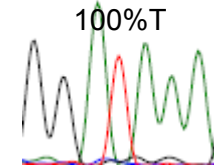

4A5-3

Cpxm1 469/470

DNA

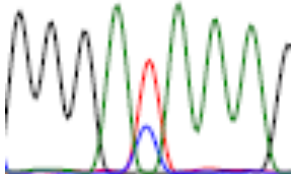

B6MxJF1P

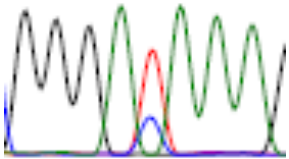

JF1MxB6P

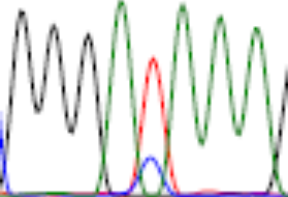

2A1-0

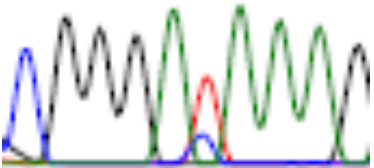

2A5-0

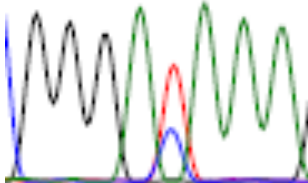

3A1-0

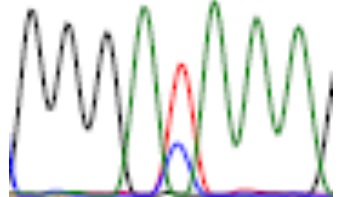

4A5-0

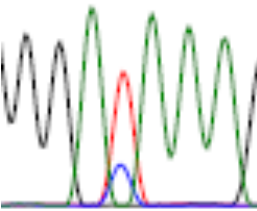

2A1-4

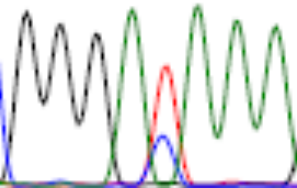

2A5-4

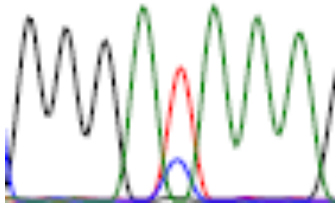

3A1-4

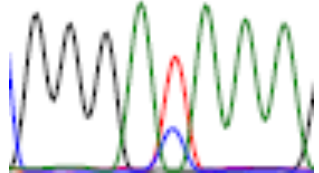

4A5-3

# Itga7 459/460

C=B6 T=JF1

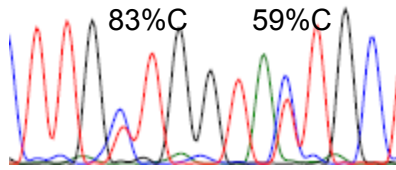

B6MxJF1P

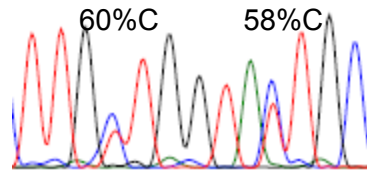

JF1MxB6P

NA

FPKM:3.0 pB6:0.73

NA

NA

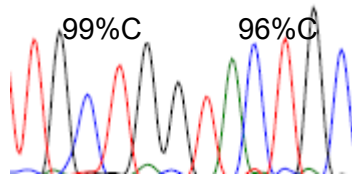

2A1-0

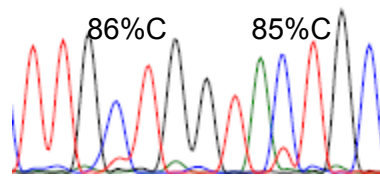

2A5-0

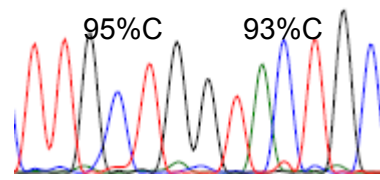

3A1-0

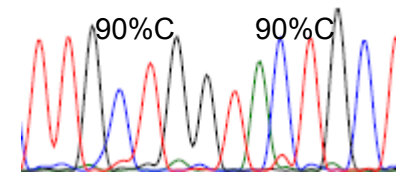

4A5-0

FPKM:34.3 pB6:0.94

FPKM:17.0 pB6:0.76

FPKM:59.8 pB6:0.94

FPKM:31.2 p pB6:0.96

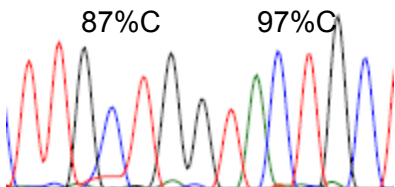

2A1-4

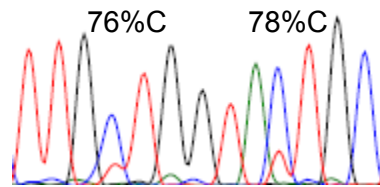

2A5-4

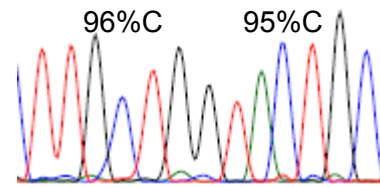

3A1-4

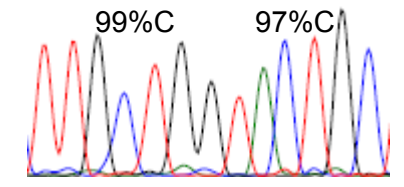

4A5-3





# Osmr 461/462

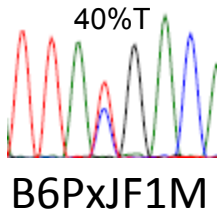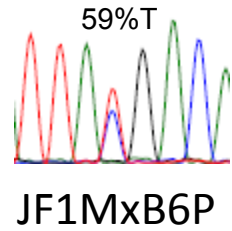

T=B6 C=JF1

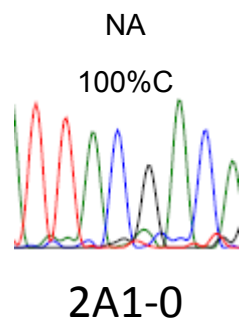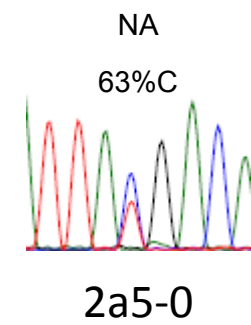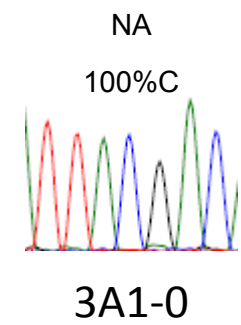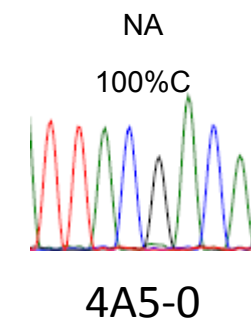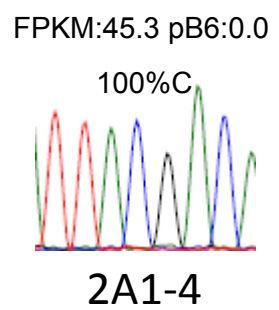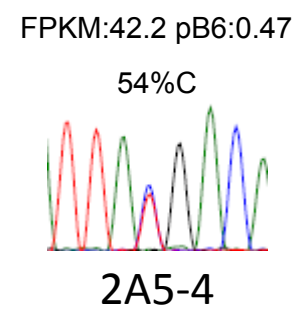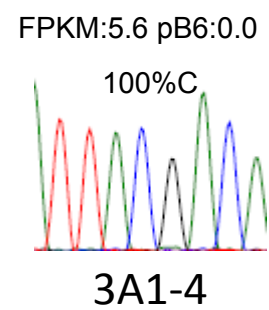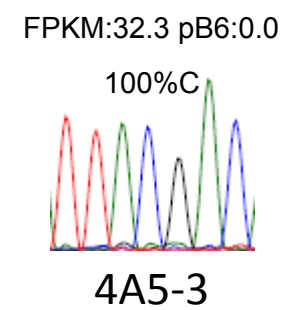

# Osmr (524/525) DNA

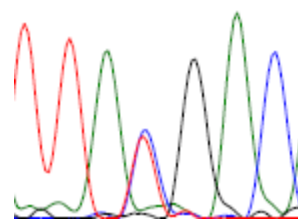

B6M/JF1P

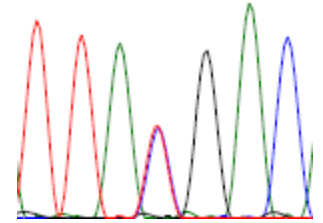

JF1M/B6P

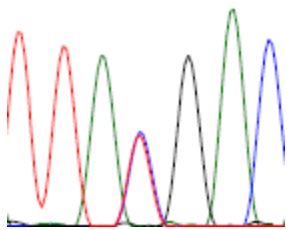

2A1-0

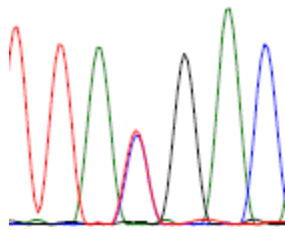

2A5-0

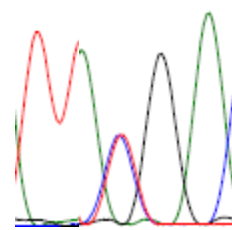

3A1-0

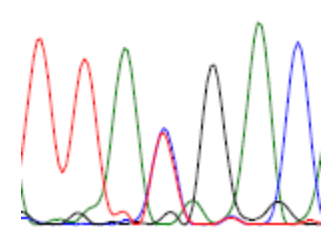

4A5-0

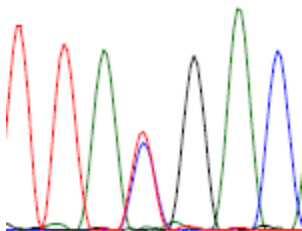

2A1-4

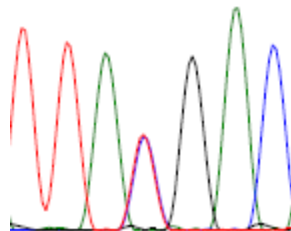

2A5-4

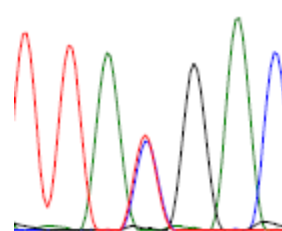

3A1-4

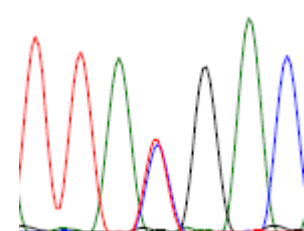

4A5-3

# Tm4sf1 463/464

T = B6 C = JF1

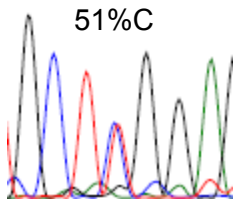

B6MxJF1P

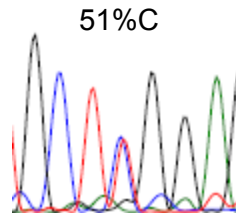

JF1MxB6P

FPKM:3.4 pB6:0.98

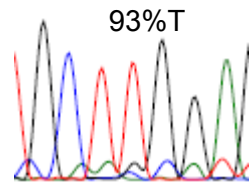

2A1-0

Bad seq

2A5-0

NA

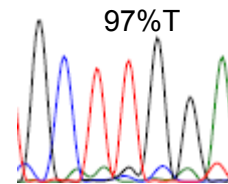

3A1-0

NA

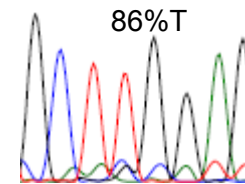

4A5-0

FPKM:53.6 pB6:0.96

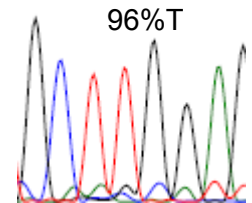

2A1-4

FPKM:74.9 pB6:0.88

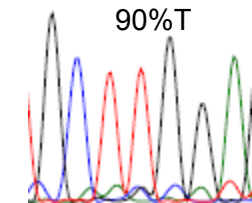

2A5-4

FPKM:8.7 pB6:0.97

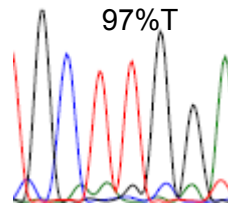

3A1-4

FPKM:32.6 pB6:0.89

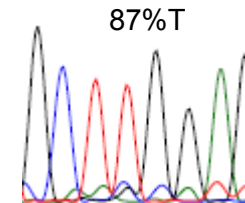

4A5-3

Tm4sf1 475/476

DNA

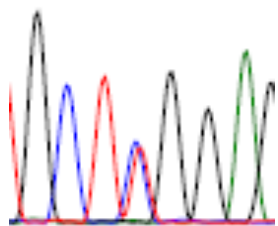

B6MxB6P

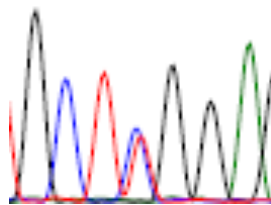

JF1MxB6P

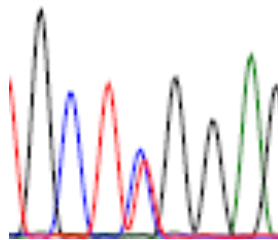

2A1-0

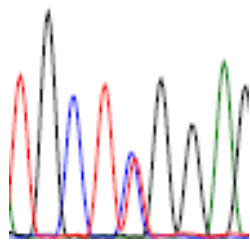

2A5-0

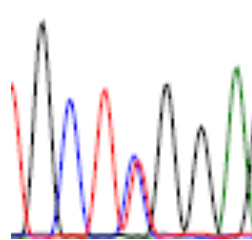

3A1-0

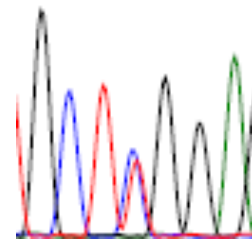

4A5-0

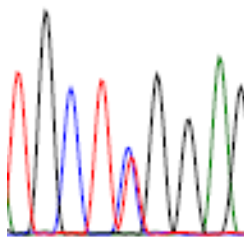

2A1-4

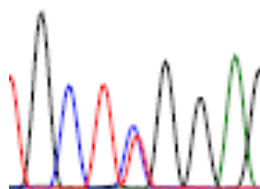

2A5-4

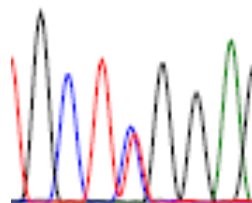

3A1-4

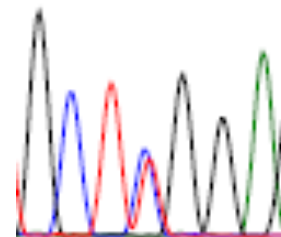

4A5-3
